# Supplementary material for: Cadmium(ii) coordination polymers based on 2-(4-((E)-2-(pyridine-2-yl)vinyl)styryl)pyridine and dicarboxylate ligands as fluorescent sensors for TNP
Source: Royal Society of Chemistry journal article supplement (doi:10.1039/c8tc04557g), 2018-01-01
Supplement: c8tc04557g1.pdf [file c8tc04557g1.pdf]

## Electronic supplementary information (ESI)

### Cadmium(II) coordination polymers based on 2-(4-((E)-2-(pyridine-2-yl)vinyl)styryl)pyridine and dicarboxylate ligands as fluorescent sensor for TNP

Xiu-Du Zhang,<sup>a</sup> Ji-Ai Hua,<sup>a,b</sup> Jin-Han Guo,<sup>a</sup> Yue Zhao,<sup>\*a</sup> and Wei-Yin Sun<sup>a</sup>

<sup>a</sup> Coordination Chemistry Institute, State Key Laboratory of Coordination Chemistry, School of Chemistry and Chemical Engineering, Nanjing National Laboratory of Microstructures, Collaborative Innovation Center of Advanced Microstructures, Nanjing University, Nanjing 210023, China

<sup>b</sup> Department of Chemistry and Chemical Engineering, Taiyuan Institute of Technology, Taiyuan, 030008, China.

\* Corresponding author.

Email address: zhaoyue@nju.edu.cn (Y. Zhao).

Table S1 Crystal data and structure refinements for **1- 3**.

|                                                | <b>1</b>                                                         | <b>2</b>                                                         | <b>3</b>                                                         |
|------------------------------------------------|------------------------------------------------------------------|------------------------------------------------------------------|------------------------------------------------------------------|
| Formula                                        | C <sub>28</sub> H <sub>20</sub> N <sub>2</sub> O <sub>4</sub> Cd | C <sub>28</sub> H <sub>20</sub> N <sub>2</sub> O <sub>4</sub> Cd | C <sub>29</sub> H <sub>24</sub> N <sub>2</sub> O <sub>5</sub> Cd |
| Formula weight                                 | 560.86                                                           | 560.86                                                           | 592.90                                                           |
| T (K)                                          | 153(2)                                                           | 153(2)                                                           | 153(2)                                                           |
| Crystal system                                 | Monoclinic                                                       | Monoclinic                                                       | Monoclinic                                                       |
| Space group                                    | <i>C2/c</i>                                                      | <i>C2</i>                                                        | <i>P2<sub>1</sub>/c</i>                                          |
| <i>a</i> (Å)                                   | 17.9642(12)                                                      | 21.789(3)                                                        | 10.1343(5)                                                       |
| <i>b</i> (Å)                                   | 6.5854(4)                                                        | 10.1900(11)                                                      | 11.5821                                                          |
| <i>c</i> (Å)                                   | 20.6384(18)                                                      | 10.2278(12)                                                      | 20.8179                                                          |
| $\beta$ (°)                                    | 114.147(2)                                                       | 97.291(2)                                                        | 93.369(2)                                                        |
| <i>V</i> (Å <sup>3</sup> )                     | 2227.9(3)                                                        | 2252.5(4)                                                        | 2439.3(2)                                                        |
| <i>Z</i>                                       | 4                                                                | 4                                                                | 4                                                                |
| <i>D</i> <sub>calc</sub> (g cm <sup>-3</sup> ) | 1.672                                                            | 1.654                                                            | 1.614                                                            |

|                                            |              |            |              |
|--------------------------------------------|--------------|------------|--------------|
| $F(000)$                                   | 1128         | 1128       | 1200         |
| $\theta$ for data collection ( $^\circ$ )  | 2.541-24.996 | 1.88-25.01 | 2.673-25.008 |
| Reflections collected                      | 7492         | 2094       | 10594        |
| Unique reflections                         | 1967         | 2094       | 4289         |
| Goodness-of-fit on $F^2$                   | 1.097        | 1.076      | 0.989        |
| $R_1$ ,                                    | 0.0227       | 0.0261     | 0.0295       |
| $wR_2$ [ $I > 2\sigma(I)$ ] <sup>a,b</sup> | 0.0646       | 0.0609     | 0.0683       |
| $R_1$ ,                                    | 0.0251       | 0.0308     | 0.0361       |
| $wR_2$ [all data]                          | 0.0662       | 0.0638     | 0.0713       |

<sup>a</sup> $R_1 = \Sigma||F_o| - |F_c||/\Sigma|F_o|$ . <sup>b</sup> $wR_2 = |\Sigma w(|F_o|^2 - |F_c|^2)|/\Sigma|w(F_o)^2|^{1/2}$ , where  $w = m = 1/[\sigma^2(F_o^2) + (aP)^2 + bP]$ .  $P = (F_o^2 + 2F_c^2)/3$

**Table S2** Selected bond lengths ( $\text{\AA}$ ) and angles ( $^\circ$ ) for assembly **1 - 3**

| <b>1</b>            |            |                     |            |
|---------------------|------------|---------------------|------------|
| Cd(1)-N(1)          | 2.284(2)   | Cd(1)-O(1)          | 2.295(2)   |
| Cd(1)-O(2)          | 2.474(2)   |                     |            |
| N(1)-Cd(1)-N(1)#1   | 120.64(10) | N(1)-Cd(1)-O(1)     | 118.82(6)  |
| N(1)#1-Cd(1)-O(1)   | 102.67(7)  | O(1)-Cd(1)-O(1)#1   | 89.79(8)   |
| N(1)-Cd(1)-O(2)#1   | 83.03(6)   | N(1)#1-Cd(1)-O(2)#1 | 87.78(6)   |
| O(1)-Cd(1)-O(2)#1   | 143.25(6)  | O(1)#1-Cd(1)-O(2)#1 | 55.09(6)   |
| O(2)#1-Cd(1)-O(2)   | 161.39(8)  |                     |            |
| <b>2</b>            |            |                     |            |
| Cd(1)-O(4)#1        | 2.295(4)   | Cd(1)-O(3)#2        | 2.356(3)   |
| Cd(1)-N(2)          | 2.360(5)   | Cd(1)-O(1)          | 2.373(4)   |
| Cd(1)-O(2)          | 2.453(3)   | Cd(1)-N(1)#3        | 2.463(5)   |
| O(4)#1-Cd(1)-O(3)#2 | 96.04(19)  | O(4)#1-Cd(1)-N(2)   | 139.81(16) |
| O(3)#2-Cd(1)-N(2)   | 81.0(2)    | O(4)#1-Cd(1)-O(1)   | 82.86(15)  |
| O(3)#2-Cd(1)-O(1)   | 93.08(18)  | N(2)-Cd(1)-O(1)     | 137.18(15) |
| O(4)#1-Cd(1)-O(2)   | 136.5(2)   | O(3)#2-Cd(1)-O(2)   | 85.67(11)  |
| N(2)-Cd(1)-O(2)     | 83.5(2)    | O(1)-Cd(1)-O(2)     | 53.7(2)    |
| O(4)#1-Cd(1)-N(1)#3 | 85.15(16)  | O(3)#2-Cd(1)-N(1)#3 | 163.90(17) |
| N(2)-Cd(1)-N(1)#3   | 87.70(16)  | O(1)-Cd(1)-N(1)#3   | 102.98(16) |

|                     |            |                     |           |
|---------------------|------------|---------------------|-----------|
| O(2)-Cd(1)-N(1)#3   | 104.54(15) |                     |           |
| <b>3</b>            |            |                     |           |
| Cd(1)-O(1)          | 2.267(2)   | Cd(1)-O(3)#1        | 2.347(2)  |
| Cd(1)-O(1W)         | 2.349(2)   | Cd(1)-N(1)          | 2.379(3)  |
| Cd(1)-N(2)#1        | 2.408(3)   | Cd(1)-O(4)#1        | 2.484(2)  |
| O(1)-Cd(1)-O(3)#1   | 133.12(7)  | O(1)-Cd(1)-O(1W)    | 85.68(7)  |
| O(3)#1-Cd(1)-O(1W)  | 94.56(7)   | O(1)-Cd(1)-N(1)     | 143.96(8) |
| O(3)#1-Cd(1)-N(1)   | 82.49(8)   | O(1W)-Cd(1)-N(1)    | 86.01(8)  |
| O(1)-Cd(1)-N(2)#1   | 89.26(8)   | O(3)#1-Cd(1)-N(2)#1 | 101.17(8) |
| O(1W)-Cd(1)-N(2)#1  | 162.39(8)  | N(1)-Cd(1)-N(2)#1   | 88.23(9)  |
| O(1)-Cd(1)-O(4)#1   | 79.59(7)   | O(3)#1-Cd(1)-O(4)#1 | 53.78(7)  |
| O(1W)-Cd(1)-O(4)#1  | 85.85(7)   | N(1)-Cd(1)-O(4)#1   | 134.56(8) |
| N(2)#1-Cd(1)-O(4)#1 | 109.82(8)  |                     |           |

Symmetry transformations used to generate equivalent atoms: #1  $-x+1, y, -z+1/2$ ; for **1**; #1  $x,y,z-1$ ; #2  $-x+1,y,-z+2$ ; #3  $x,y,z+1$  for **2**; #1  $x-1,y,z$  for **3**.

**Table S3**Hydrogen bonding data of **2**and**3**.

| <b>2</b>                      |                             |                                     |                                            |                                   |
|-------------------------------|-----------------------------|-------------------------------------|--------------------------------------------|-----------------------------------|
| <i>D</i> -H $\cdots$ <i>A</i> | <i>d</i> ( <i>D</i> -H) (Å) | <i>d</i> (H $\cdots$ <i>A</i> ) (Å) | <i>d</i> ( <i>D</i> $\cdots$ <i>A</i> )(Å) | <i>D</i> -H $\cdots$ <i>A</i> (°) |
| C(2)-H(2) $\cdots$ O(4)       | 0.9500                      | 2.4500                              | 3.143(8)                                   | 129                               |
| C(4)-H(4) $\cdots$ O(1)       | 0.9500                      | 2.3500                              | 3.267(8)                                   | 162                               |
| C(6)-H(6) $\cdots$ O(2)       | 0.9500                      | 2.4300                              | 3.362(8)                                   | 169                               |
| C(9)-H(9) $\cdots$ O(2)       | 0.9500                      | 2.3500                              | 3.295(8)                                   | 171                               |
| C(15)-H(15) $\cdots$ O(3)     | 0.9500                      | 2.5000                              | 3.436(9)                                   | 167                               |
| C(18)-H(18) $\cdots$ O(1)     | 0.9500                      | 2.628                               | 3.474(9)                                   | 148                               |
| C(20)-H(20) $\cdots$ O(2)     | 0.9500                      | 2.3700                              | 3.010(9)                                   | 124                               |
| <b>3</b>                      |                             |                                     |                                            |                                   |
| O(1W)-H(1WB) $\cdots$ O(1)    | 0.8400                      | 1.9500                              | 2.754(3)                                   | 162                               |
| O(1W)-H(1WA) $\cdots$ O(4)    | 0.8800                      | 1.9700                              | 2.770(3)                                   | 151                               |
| C(1)-H(1) $\cdots$ O(1)       | 0.9500                      | 2.5000                              | 3.208(4)                                   | 131                               |
| C(3)-H(3) $\cdots$ O(4)       | 0.9500                      | 2.3900                              | 3.298(4)                                   | 160                               |
| C(6)-H(6) $\cdots$ O(3)       | 0.9500                      | 2.3400                              | 3.279(4)                                   | 170                               |
| C(7)-H(7) $\cdots$ O(1)       | 0.9500                      | 2.5600                              | 3.437(4)                                   | 153                               |
| C(10)-H(10) $\cdots$ O(2)     | 0.9500                      | 2.5300                              | 3.432(4)                                   | 159                               |

|                  |        |        |          |     |
|------------------|--------|--------|----------|-----|
| C(12)-H(12)⋯O(3) | 0.9500 | 2.5300 | 3.468(4) | 172 |
| C(15)-H(15)⋯O(2) | 0.9500 | 2.3400 | 3.277(4) | 170 |
| C(20)-H(20)⋯O(3) | 0.9500 | 2.3200 | 2.946(4) | 123 |

**Scheme 1** The structure of ligand L and auxiliary carboxylate ligands used.

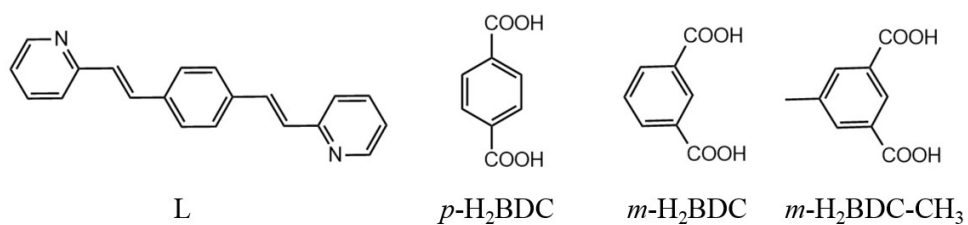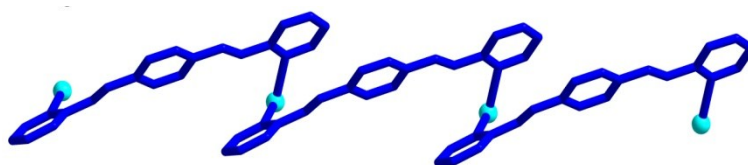

**Fig. S1** The chain of Cd(II)-L in **3**.

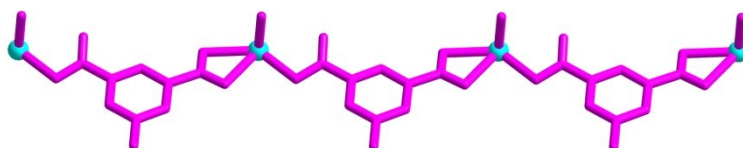

**Fig. S2** The chain of Cd(II)-*m*-BDC-CH<sub>3</sub> in **3**.

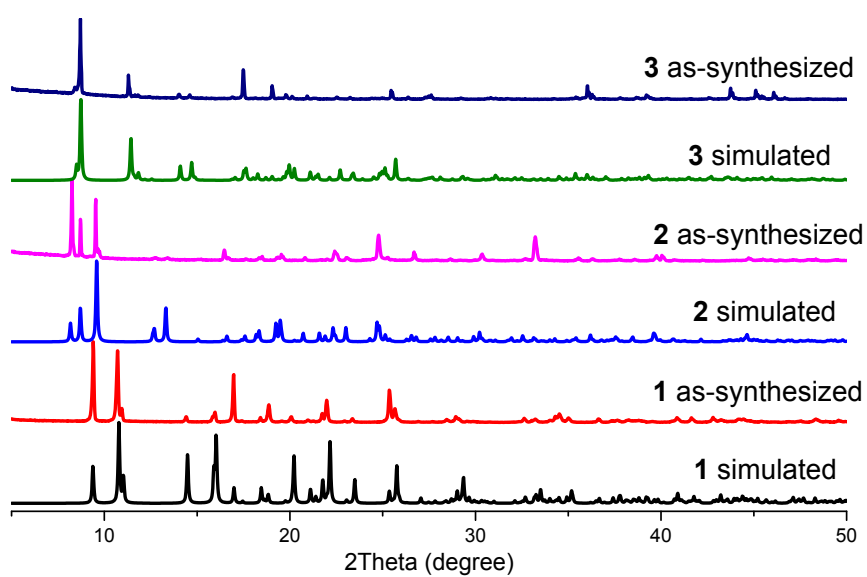

**Fig. S3** PXRD patterns of complexes **1** - **3**.

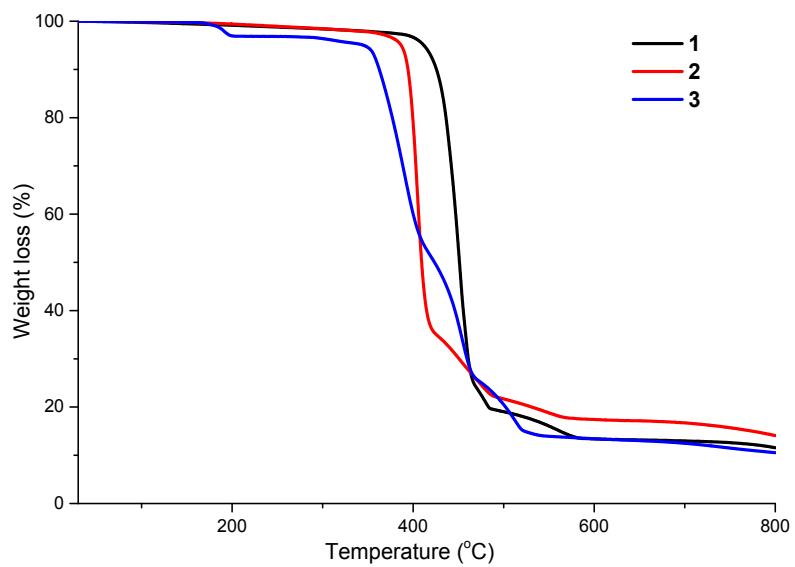

**Fig. S4** TG curves of **1 - 3**.

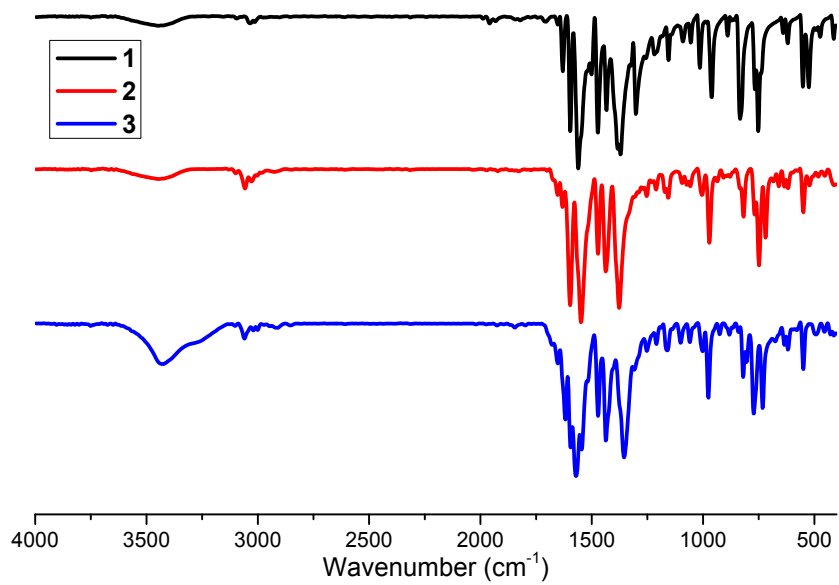

**Fig. S5** IR spectra of **1 - 3**.

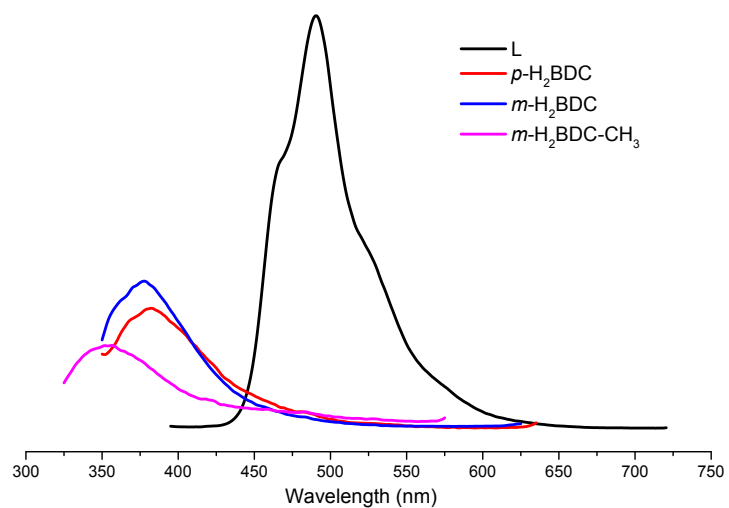

(a)

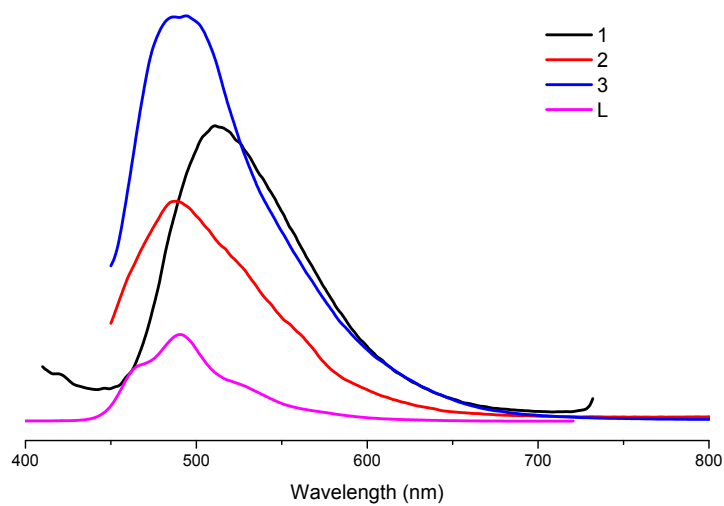

(b)

**Fig. S6**(a) Emission spectra of **L** and dicarboxylate ligands in the solid state at room temperature. (b) Emission spectra of **1 - 3** and ligand **L** in the solid state at room temperature.

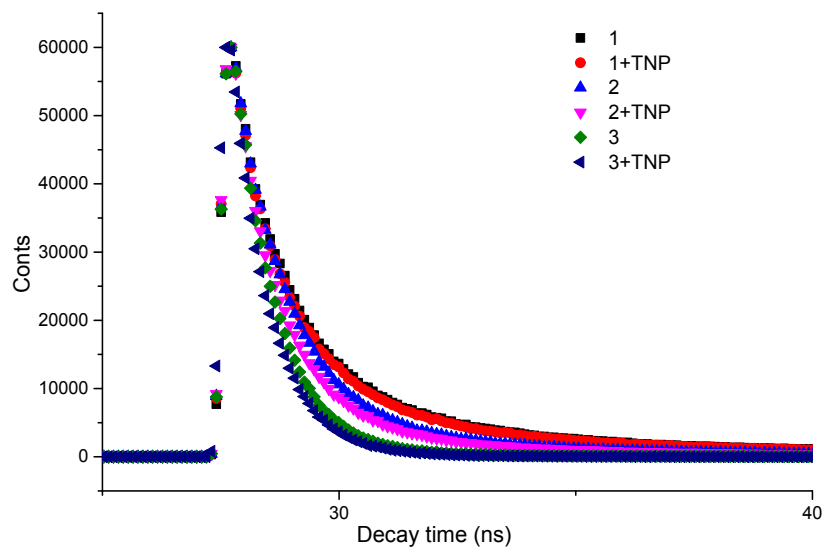

**Fig. S7** Lifetimes of **1-3** dispersed in DMF before and after the addition of the DMF solution of TNP.

**Table S4** Comparison of the  $K_{SV}$  of **1 - 3** towards TNP with other materials.

|                                                                                            | $K_{SV}$ ( $M^{-1}$ )               | Reference |
|--------------------------------------------------------------------------------------------|-------------------------------------|-----------|
| <b>1</b>                                                                                   | $5.72 \times 10^4$                  | This work |
| <b>2</b>                                                                                   | $4.67 \times 10^4$                  | This work |
| <b>3</b>                                                                                   | $1.86 \times 10^5$                  | This work |
| CP-C60 composite assembly                                                                  | $3.75 \times 10^5$                  | 1         |
| [CP (NH <sub>2</sub> BDC) (DMF)]                                                           | $7.2 \times 10^3$                   | 2         |
| {[Zn(IPA)(L)] <sub>n</sub> }/ {[Cd(IPA)(L)] <sub>n</sub> }                                 | $2.16 \times 10^4/1.52 \times 10^4$ | 3         |
| [Zn( $\mu_2$ -1H-ade)( $\mu_2$ -SO <sub>4</sub> ) <sub>n</sub> ]                           | $3.14 \times 10^4$                  | 4         |
| {(H <sub>2</sub> pip)[Fe(pydc-2,5) <sub>2</sub> (H <sub>2</sub> O)]·2H <sub>2</sub> O}     | $6.2 \times 10^4$                   | 5         |
| [Ca(DMF) <sub>4</sub> Ag <sub>2</sub> (SCN) <sub>4</sub> ] <sub>n</sub>                    | $1.74 \times 10^4$                  | 6         |
| {[Zn <sub>3</sub> (mtrb) <sub>3</sub> (btc) <sub>2</sub> ]·3H <sub>2</sub> O} <sub>n</sub> | $3.26 \times 10^4$                  | 7         |
| [Cd(NDC)L] <sub>2</sub> ·H <sub>2</sub> O                                                  | $3.7 \times 10^4$                   | 8         |

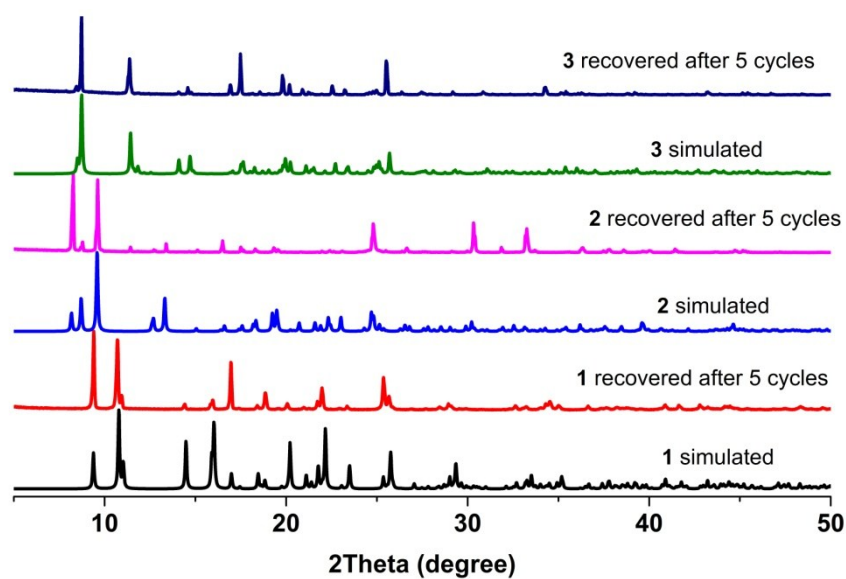

**Fig. S8** PXRD patterns of complexes **1 - 3** and their recovered samples after five cycles immersed in the DMF solution of TNP. .

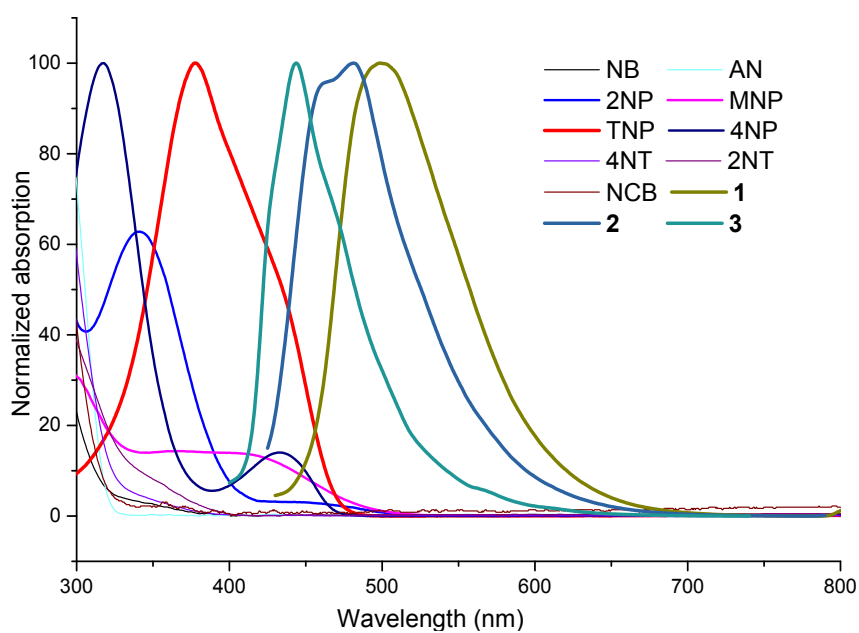

**Fig. S9** The normalized emission bands of complexes **1 - 3** and UV-vis absorption of AN and selected nitroaromatic compounds (other analytes excluded due to no absorption bands in the range of 300 -800 nm).



**Table S5** Frontier molecular orbital energies for complexes **1-3** and TNP at the generalized gradient approximation GGA-PBE level of theory.

|          | HOMO (eV) | LUMO (eV) | Energy gap (eV) |
|----------|-----------|-----------|-----------------|
| TNP      | -6.967    | -5.816    | 1.151           |
| <b>1</b> | -6.057    | -4.022    | 2.035           |
| <b>2</b> | -5.928    | -4.043    | 1.885           |
| <b>3</b> | -5.856    | -3.966    | 1.891           |

#### References

- [1] A. Nilchi, M. Yaftian, G. Aboulhasanlo, S. R. Garmarodi, *J. Radioanal. Nucl. Chem.*, **2009**, 279, 65-74.
- [1] D. K. Singha, P. Mahata, *RSC Adv.*, **2015**, 5, 28092-28097.
- [2] K. S. Asha, G. S. Vaisakhan, S. Mandal, *Nanoscale*, **2016**, 8, 11782-11786.
- [3] D. Parmar, Y. Rachuri, K. K. Bisht, R. Laiya, E. Suresh, *Inorg. Chem.*, **2017**, 56, 2627-2638.
- [4] Y. Rachuri, B. Parmar, K. K. Bisht, E. Suresh, *Cryst. Growth Des.*, **2017**, 17, 1363-1372.
- [5] D. K. Singha, P. Mahata, *Dalton Trans.*, **2017**, 46, 11344-11354.
- [6] X. L. Yin, S. C. Meng, J. M. Xie, *J. Cluster Sci.*, **2018**, 29, 411-416.
- [7] Y. Q. Zhang, V. A. Blatov, T. R. Zheng, C. H. Yang, L. L. Qian, K. Li, B. L. Li, B. Wu, *Dalton Trans.*, **2018**, 47, 6189-6198.
- [8] B. Q. Song, C. Qin, Y. T. Zhang, X. S. Wu, L. Yang, K. Z. Shao, Z. M. Su, *Dalton Trans.*, **2015**, 44, 18386-18394.
